# Supplementary material
Source: Copernicus journal article supplement (doi:10.5194/acp-26-6593-2026)
Supplement: Supplementary file 1 [file acp-26-6593-2026-supplement.pdf]

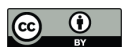

*Supplement of*

## **Evaluating Long-term seasonal variability of aerosol optical properties in Colorado**

**Erin K. Boedicker et al.**

*Correspondence to:* A. Gannet Hallar ([gannet.hallar@utah.edu](mailto:gannet.hallar@utah.edu))

The copyright of individual parts of the supplement might differ from the article licence.

## Section S1: Measurement comparisons for SPL PSAP and CLAP data

At SPL, aerosol absorption coefficients ( $\sigma_{ap}$ ) were measured using both a Particle Soot Absorption Photometer (PSAP; Radiance Research) and a Continuous Light Absorption Photometer (CLAP; NOAA; Ogren et al., 2017). The PSAP operated from 2011 – 2018, and the CLAP has been run from 2011 to the present. Both instruments measure absorption at three wavelengths – the PSAP at 467, 530, and 660 nm, and the CLAP at 467, 528, and 652 nm – and have previously been shown to be comparable measurements (Ogren et al., 2017). While data from this paper uses only the CLAP data from SPL, the previous analysis done by Japngie-Green et al. (2019) used data from the PSAP from 2011 – 2013 and CLAP data from 2013 – 2016. Since this paper follows work done by Japngie-Green et al. (2019) but only uses CLAP data, the PSAP and CLAP measurements were compared to ensure that the two sampling methods were in relative agreement. Data in this comparison includes all PSAP and CLAP measurements from 2012 – 2016, and wavelengths were adjusted to match the TSI scattering measurements (450, 550, and 700 nm). Measurements were corrected for scattering and filter artifacts, sample area, flowrate, and non-idealities in the manufacturer’s calibration (Bond et al., 1999; Ogren, 2010).

30 **Table S1:** Summary of linear regression comparisons between PSAP and CLAP data

### Absorption coefficient ( $\sigma_{ap}$ ) comparison

|               | 450 nm            |                   | 550 nm            |                   | 700 nm            |                   |
|---------------|-------------------|-------------------|-------------------|-------------------|-------------------|-------------------|
|               | Slope             | Int.              | Slope             | Int.              | Slope             | Int.              |
| <b>Hourly</b> | $0.884 \pm 0.002$ | $0.093 \pm 0.004$ | $0.941 \pm 0.001$ | $0.012 \pm 0.002$ | $0.870 \pm 0.001$ | $0.039 \pm 0.002$ |
| <b>Daily</b>  | $0.880 \pm 0.004$ | $0.090 \pm 0.008$ | $0.911 \pm 0.005$ | $0.053 \pm 0.007$ | $0.856 \pm 0.005$ | $0.066 \pm 0.006$ |

### Absorption Ångström exponent (AAE) comparison

|               | 450 & 550 nm      |                 | 450 & 700 nm     |                 | 550 & 700 nm      |                 |
|---------------|-------------------|-----------------|------------------|-----------------|-------------------|-----------------|
|               | Slope             | Int.            | Slope            | Int.            | Slope             | Int.            |
| <b>Hourly</b> | $0.786 \pm 0.006$ | $0.25 \pm 0.01$ | $0.852 \pm 0.05$ | $0.35 \pm 0.01$ | $0.822 \pm 0.007$ | $0.51 \pm 0.01$ |
| <b>Daily</b>  | $0.80 \pm 0.02$   | $0.24 \pm 0.03$ | $0.85 \pm 0.02$  | $0.36 \pm 0.03$ | $0.84 \pm 0.02$   | $0.50 \pm 0.03$ |

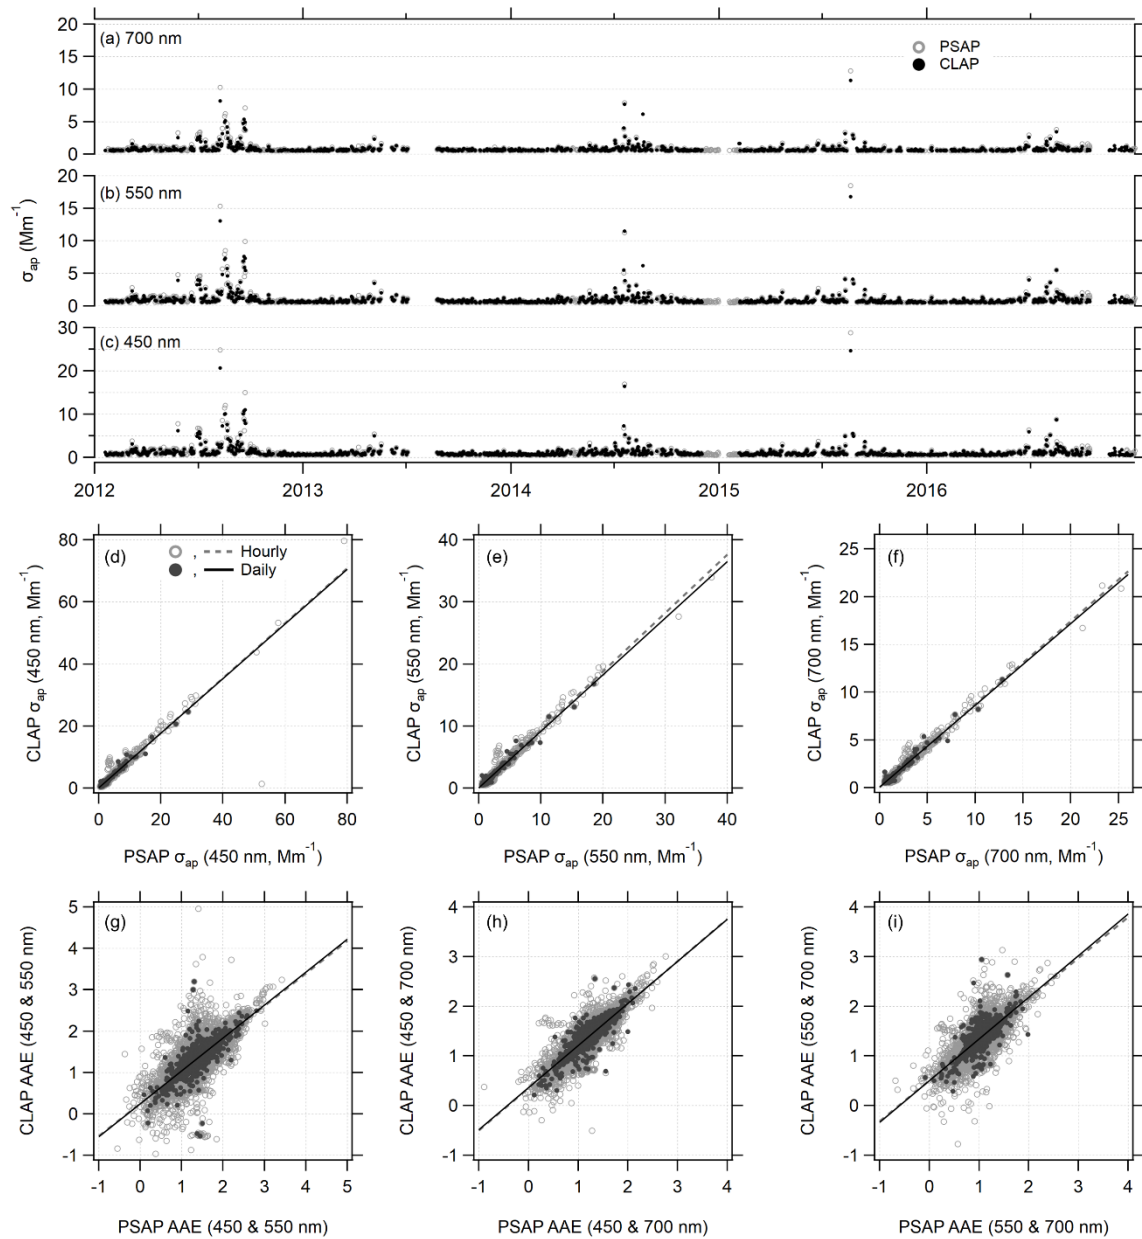

35 **Figure S1:** Intercomparison of CLAP and PSAP data. Timeseries show daily median  $\sigma_{ap}$  at all three wavelengths: (a) 450 nm, (b) 550 nm, and (c) 700 nm. The bottom plots show intercomparisons between hourly and daily averaged  $\sigma_{ap}$  data at (d) 450 nm, (e) 550 nm, and (f) 700 nm, and AAE values for (g) 450 & 550 nm, (h) 450 & 700 nm, and (i) 550 & 700 nm. In all intercomparison plots open markers show hourly averaged data, dashed lines show the linear relationship for hourly averaged data, closed markers show the daily averaged data, and solid lines show the linear relationship for the daily averaged data.

## 40 Section S2: Description of auxiliary data treatment and calculations

### Wavelength adjustment of absorption coefficient

In order to harmonize the wavelengths of the scattering and absorption coefficient measurements, we adjusted the wavelengths of the absorption coefficients (467, 528, and 652 nm) to match those of the scattering coefficients (450, 550, 700 nm). This is often called the Angstrom adjustment:

$$45 \quad \sigma_{ap,i} = \sigma_{ap,j} \left( \frac{\lambda_i}{\lambda_j} \right)^{AAE}, \quad (S1)$$

where AAE is the absorption Angstrom exponent defined in equation 4 of the main text,  $\lambda$  represents wavelength, and the  $i$  and  $j$  subscripts indicate the adjusted and measured wavelength, respectively.

### Error calculations for measured and calculated variables

Following previous established methods for error propagation (Sherman et al., 2015), we have calculated the typical fractional  
50 uncertainties for hourly averaged data when PM10  $\sigma_{sp} = 50 \text{ Mm}^{-1}$  and when  $\sigma_{ap} = 1 \text{ Mm}^{-1}$ . These are provided below in **Table S2**. We chose those two values to represent average uncertainties for extreme/outlier events and for very clean conditions that we used as the filtering cut offs. Note these are the averages for SPL and BOS - the uncertainties are slightly different for both sites as they depend on things like measurement temperature and pressure, and the correlations between various optical parameters. More details are in the supplemental materials of Sherman et al. (2015).

55 **Table S2:** Uncertainties of measured and calculated as a function of loading.

|                                    | $\sigma_{sp}$ | $\sigma_{ap}$ | SAE  | BFR  | SSA  | AAE   | $R_{sp}$ | $R_{ap}$ |
|------------------------------------|---------------|---------------|------|------|------|-------|----------|----------|
| $\sigma_{sp} = 50 \text{ Mm}^{-1}$ | 9.2%          | 20%           | 2.9% | 2.3% | 1.0% | 10%   | 2.8%     | 5.9%     |
| $\sigma_{sp} = 1 \text{ Mm}^{-1}$  | 10%           | 40%           | 6.3% | 8.2% | 3.5% | 32.2% | 3.1%     | 30%      |

### Filtering for calculated parameters

Calculated parameters are more heavily influenced by instrument noise and are less reliable when  $\sigma_{sp}$  and  $\sigma_{ap}$  values are low.  
60 For this reason, filtering of the calculated parameters was done to exclude values where  $\sigma_{sp} < 1 \text{ Mm}^{-1}$  and  $\sigma_{ap} < 0.5 \text{ Mm}^{-1}$ . This filtering predominately affected parameters related to absorption, and the SPL data was more heavily impacted as the site has lower overall aerosol loadings. Approximately 9%, 14%, 52%, 65% of the BFR, SAE, SSA, and AAE data at SPL, and approximately 1%, 2%, 14%, and 21% of the BFR, SAE, SSA, and AAE data at BOS were removed due to these constraints. However, the overall statistical values for the variables were not significantly changed as a result (**Table S3**).

65

**Table S3:** Unfiltered and filtered optical data from SPL and BOS using the  $\sigma_{sp} > 1 \text{ Mm}^{-1}$  and  $\sigma_{ap} > 0.5 \text{ Mm}^{-1}$  bounds. Number of hourly data points is reported, along with the 25<sup>th</sup>, 50<sup>th</sup>, and 75<sup>th</sup> percentile values for each optical parameter.

|            |                      | BFR        |          | SAE        |          | SSA        |          | AAE        |          |
|------------|----------------------|------------|----------|------------|----------|------------|----------|------------|----------|
|            |                      | unfiltered | filtered | unfiltered | filtered | unfiltered | filtered | unfiltered | filtered |
| <b>SPL</b> | # hourly data points | 105838     | 96502    | 105776     | 91431    | 86358      | 41359    | 89303      | 30912    |
|            | 75 <sup>th</sup>     | 0.181      | 0.177    | 2.024      | 1.999    | 0.941      | 0.938    | 1.65       | 1.667    |
|            | 50 <sup>th</sup>     | 0.158      | 0.157    | 1.736      | 1.735    | 0.924      | 0.925    | 1.402      | 1.446    |
|            | 25 <sup>th</sup>     | 0.137      | 0.139    | 1.339      | 1.369    | 0.900      | 0.907    | 1.073      | 1.24     |
|            | # hourly data points | 44781      | 44327    | 44729      | 43726    | 40549      | 34917    | 43562      | 34397    |
| <b>BOS</b> | 75 <sup>th</sup>     | 0.170      | 0.170    | 1.935      | 1.931    | 0.925      | 0.923    | 1.546      | 1.505    |
|            | 50 <sup>th</sup>     | 0.152      | 0.152    | 1.685      | 1.685    | 0.899      | 0.897    | 1.375      | 1.358    |
|            | 25 <sup>th</sup>     | 0.135      | 0.135    | 1.352      | 1.352    | 0.864      | 0.860    | 1.204      | 1.200    |

70

### Calculation of an upper bound for $\sigma_{sp}$

To determine an appropriate upper limit for identifying spikes, a simple outlier calculation was done on the data for each month based on the interquartile range (IQR). The upper limit was based on the equation:

$$\sigma_{sp,upper} = Q75 + (IQR \times 1.5), \quad (S2)$$

75 where Q75 represents the 75th percentile and IQR represents the interquartile range of the measurements. The average monthly  $\sigma_{sp,upper}$  for the entire data range of the SPL and BOS  $\sigma_{sp}$  data were  $30 \pm 40 \text{ Mm}^{-1}$  and  $50 \pm 50 \text{ Mm}^{-1}$  respectively. For both SPL and BOS, the highest calculated upper bounds were in the summer months (**Table S4**). In the analysis presented, a uniform value of  $50 \text{ Mm}^{-1}$  was used in the identification of spikes to reasonably capture possible outlier events at both sites and to ensure consistent treatment of the data.

80

**Table S4:** Calculated  $\sigma_{sp,upper}$  ( $\text{Mm}^{-1}$ ) values by season for SPL and BOS.

|     | Winter (Dec -Feb)            | Spring (March – May)         | Summer (June – Aug)          | Fall (Sep – Nov)             |
|-----|------------------------------|------------------------------|------------------------------|------------------------------|
|     | $\mu \pm \sigma$ (min – max) |
| SPL | $7 \pm 3$ (3 – 19)           | $19 \pm 6$ (7 – 30)          | $50 \pm 60$ (15 – 297)       | $30 \pm 30$ (5 – 169)        |
| BOS | $40 \pm 20$ (19 – 107)       | $40 \pm 10$ (20 – 66)        | $80 \pm 70$ (25 – 302)       | $60 \pm 50$ (21 – 201)       |

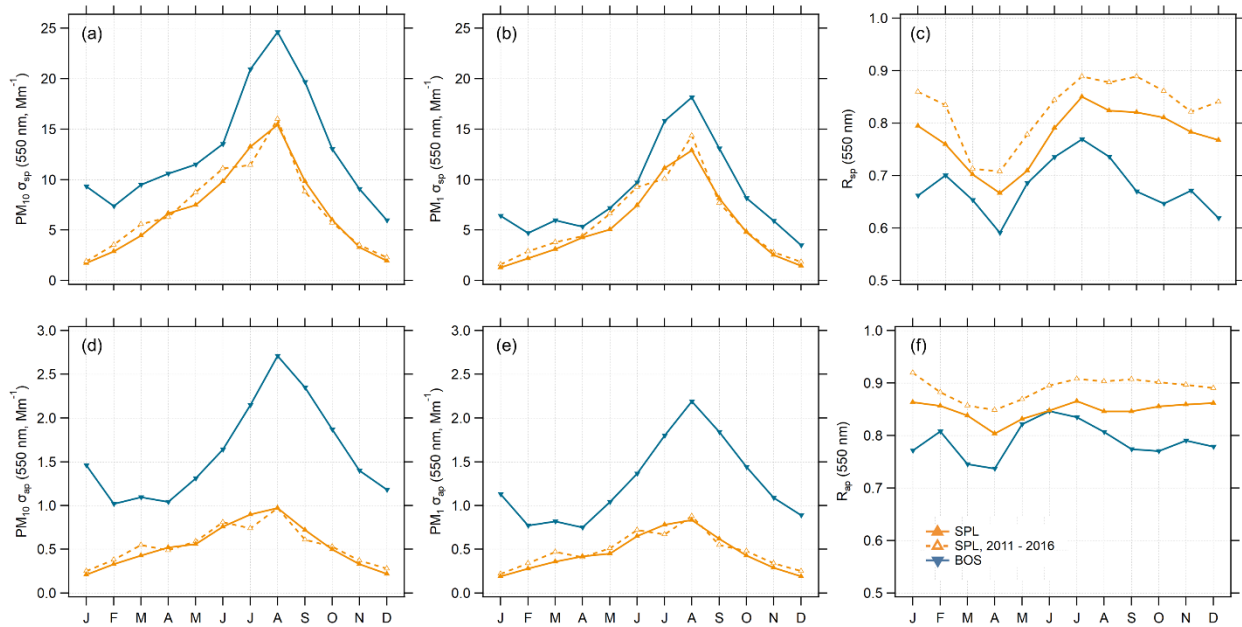

**Figure S2:** Monthly median (a)  $PM_{10} \sigma_{sp}$  at 550 nm, (b)  $PM_1 \sigma_{sp}$  at 550 nm, (c) sub-micron scattering ( $R_{sp}$ ) fractions, (d)  $PM_{10} \sigma_{ap}$  at 550 nm, (e)  $PM_1 \sigma_{ap}$  at 550 nm, and (f) sub-micron absorption ( $R_{ap}$ ) fractions. Medians for the entire SPL data range are shown as solid orange traces with closed markers, and medians for the 2011-2016 period are shown as dashed lines with open markers. Data for BOS is shown by the solid blue trace with closed markers.

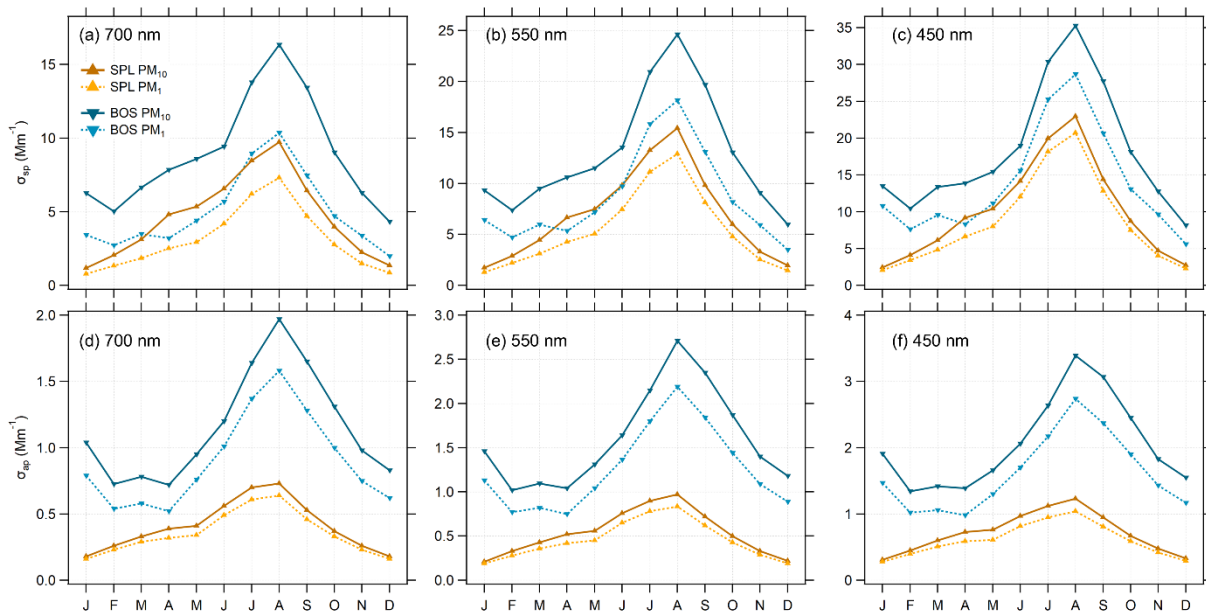

95 **Figure S3:** Monthly median values of  $\sigma_{sp}$  at (a) 700 nm, (b) 550 nm, and (c) 450 nm in the top row of figures, and  $\sigma_{ap}$  at (d) 700 nm, (e) 550 nm, and (f) 450 nm in the bottom row of figures. Data for SPL is shown in orange, and data for BOS is shown in blue.  $PM_{10}$  data is represented with solid lines and  $PM_1$  data is shown as dashed lines. Note the changes in y-axis between the figures.

100

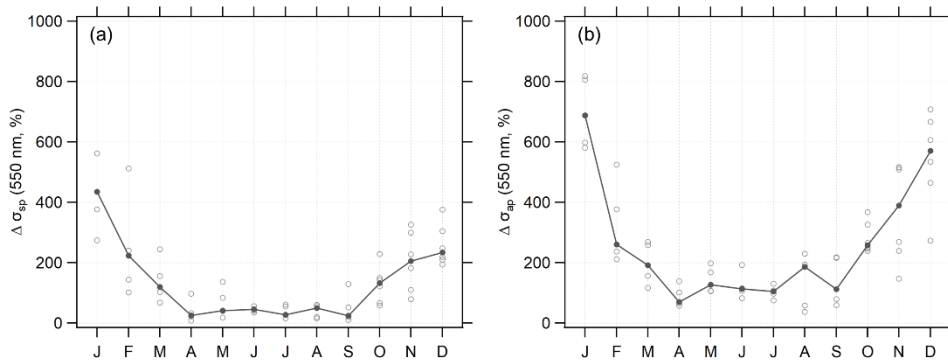

**Figure S4:** Percent difference between BOS and SPL (a)  $\sigma_{sp}$  and (b)  $\sigma_{ap}$  monthly median values for the 550 nm measurement. Values were calculated using:  $\Delta\sigma = (\sigma_{BOS} - \sigma_{SPL}) / \sigma_{SPL} \times 100$ . Open markers show the calculated value by month, and the solid grey trace shows the median percent difference.

105

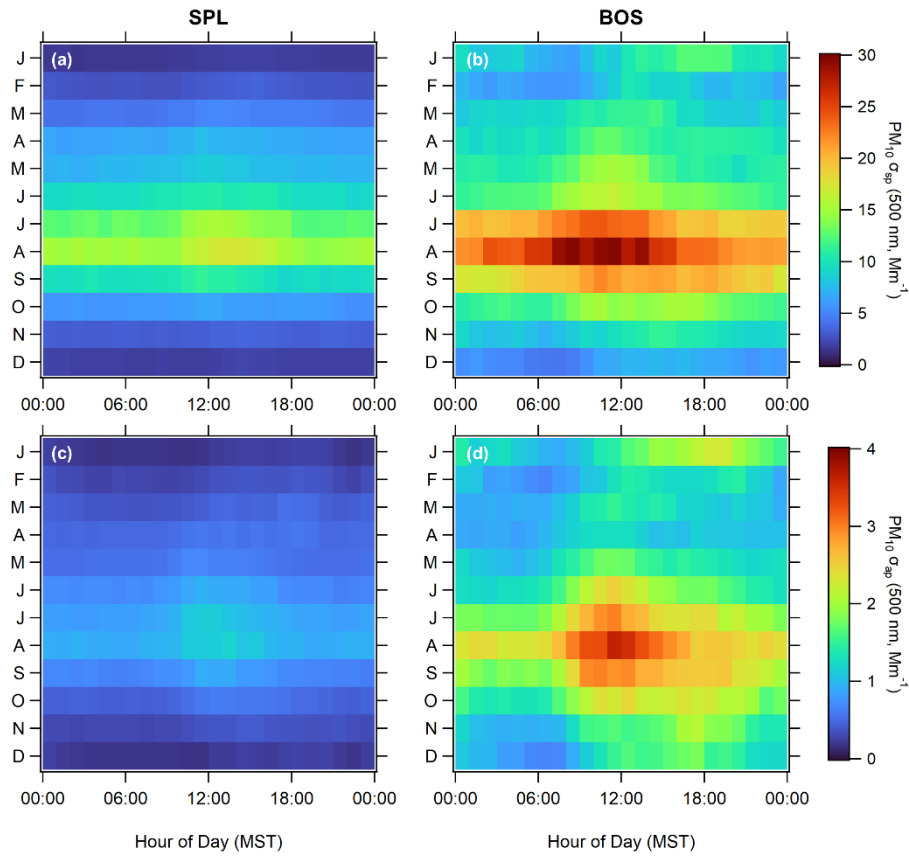

**Figure S5:** Monthly diurnal cycles of median scattering for (a) SPL and (b) BOS, and median absorption for (c) SPL and (d) BOS.

110

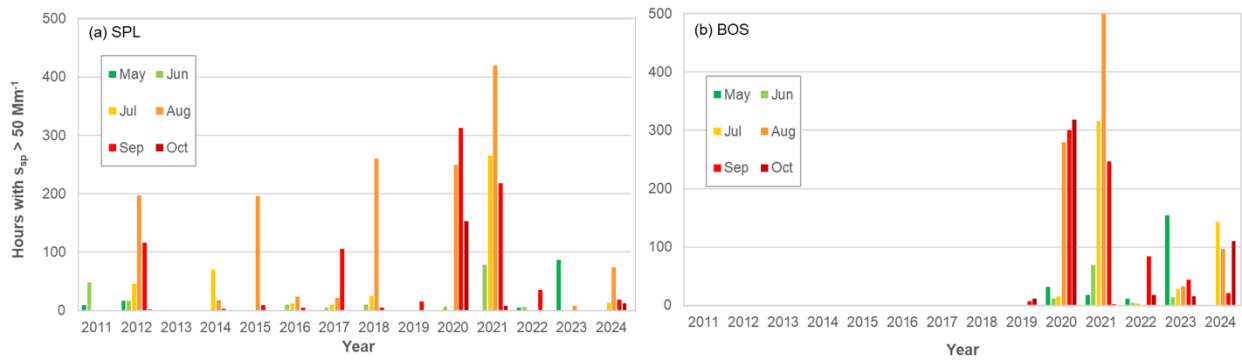

**Figure S6:** Number of hours at (a) SPL and (b) BOS during the months of May to October, where  $\sigma_{sp}$  was greater than 50  $Mm^{-1}$ .

115

**Table S5:** Number of hours that exceed the 50 Mm<sup>-1</sup> upper bound by year and month at SPL and BOS. Bold numbers show the total yearly and monthly number of hours and July – September data are shaded as they are the three months with the most instances of exceedance at both sites. If no data is available for a given month and year, then the table was left blank.

|            | 2011      | 2012       | 2013     | 2014      | 2015       | 2016      | 2017       | 2018       | 2019       | 2020        | 2021        | 2022       | 2023       | 2024       |             |
|------------|-----------|------------|----------|-----------|------------|-----------|------------|------------|------------|-------------|-------------|------------|------------|------------|-------------|
| <b>SPL</b> |           |            |          |           |            |           |            |            |            |             |             |            |            |            |             |
| Jan        | 0         | 0          | 0        | 0         | 0          | 0         | 0          | 0          | 0          | 0           | 0           | 0          | 0          | 0          | <b>0</b>    |
| Feb        | 0         | 0          | 0        | 0         | 0          | 0         | 0          | 0          | 0          | 0           | 0           | 0          | 0          | 0          | <b>0</b>    |
| Mar        | 18        | 4          | 0        | 0         | 0          | 0         | 0          | 5          | 0          | 0           | 1           | 0          | 1          | 0          | <b>29</b>   |
| Apr        | 12        | 1          | 0        | 0         | 4          | 0         | 2          | 0          | 0          | 1           | 0           | 3          | 3          | 0          | <b>26</b>   |
| May        | 9         | 17         | 0        | 0         | 0          | 0         | 0          | 0          | 0          | 0           | 1           | 5          | 87         | 0          | <b>119</b>  |
| Jun        | 48        | 16         | 0        | 1         | 0          | 10        | 5          | 10         | 0          | 7           | 78          | 6          | 0          | 1          | <b>182</b>  |
| Jul        | 0         | 46         | 0        | 70        | 0          | 12        | 10         | 25         | 0          | 1           | 265         | 0          | 1          | 13         | <b>443</b>  |
| Aug        | 0         | 197        | 0        | 18        | 196        | 24        | 22         | 260        | 0          | 250         | 420         | 1          | 8          | 74         | <b>1470</b> |
| Sep        | 0         | 116        | 0        | 3         | 9          | 5         | 106        | 5          | 15         | 313         | 218         | 35         | 1          | 19         | <b>845</b>  |
| Oct        | 0         | 2          | 0        | 0         | 0          | 0         | 0          | 0          | 1          | 153         | 8           | 0          | 0          | 12         | <b>176</b>  |
| Nov        | 0         | 0          | 0        | 0         | 0          | 0         | 0          | 0          | 0          | 0           | 0           | 0          | 0          | 0          | <b>0</b>    |
| Dec        | 0         | 0          | 0        | 0         | 0          | 0         | 1          | 0          | 0          | 0           | 0           | 0          | 0          | 0          | <b>1</b>    |
|            | <b>87</b> | <b>399</b> | <b>0</b> | <b>92</b> | <b>209</b> | <b>51</b> | <b>146</b> | <b>305</b> | <b>16</b>  | <b>725</b>  | <b>991</b>  | <b>50</b>  | <b>101</b> | <b>119</b> |             |
| <b>BOS</b> |           |            |          |           |            |           |            |            |            |             |             |            |            |            |             |
| Jan        |           |            |          |           |            |           |            |            |            | 14          | 57          | 26         | 102        | 17         | <b>216</b>  |
| Feb        |           |            |          |           |            |           |            |            |            | 32          | 149         | 20         | 6          | 1          | <b>208</b>  |
| Mar        |           |            |          |           |            |           |            |            |            | 55          | 98          | 26         | 68         | 12         | <b>259</b>  |
| Apr        |           |            |          |           |            |           |            |            |            | 13          | 21          | 0          | 2          | 14         | <b>50</b>   |
| May        |           |            |          |           |            |           |            |            |            | 31          | 18          | 11         | 154        | 0          | <b>214</b>  |
| Jun        |           |            |          |           |            |           |            |            |            | 11          | 69          | 4          | 13         | 1          | <b>98</b>   |
| Jul        |           |            |          |           |            |           |            |            |            | 15          | 316         | 3          | 28         | 143        | <b>505</b>  |
| Aug        |           |            |          |           |            |           |            |            |            | 280         | 501         | 1          | 32         | 96         | <b>910</b>  |
| Sep        |           |            |          |           |            |           |            |            | 7          | 301         | 247         | 84         | 44         | 21         | <b>704</b>  |
| Oct        |           |            |          |           |            |           |            |            | 11         | 318         | 2           | 18         | 15         | 110        | <b>474</b>  |
| Nov        |           |            |          |           |            |           |            |            | 101        | 1           | 31          | 2          | 4          | 6          | <b>145</b>  |
| Dec        |           |            |          |           |            |           |            |            | 42         | 30          | 1           | 14         | 47         | 0          | <b>134</b>  |
|            |           |            |          |           |            |           |            |            | <b>161</b> | <b>1101</b> | <b>1510</b> | <b>209</b> | <b>515</b> | <b>421</b> |             |

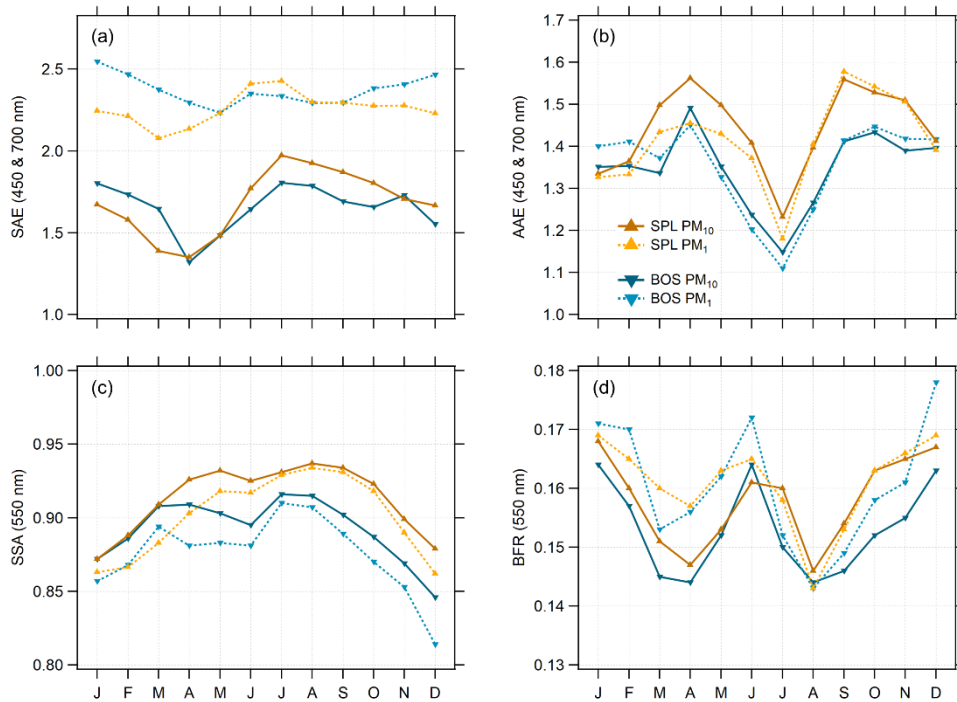

125 **Figure S7:** Monthly median values of (a) SAE for 450 & 700nm, (b) AAE for 450 & 700 nm, (c) SSA for 550 nm, and (d) BFR for 550 nm. Data for SPL is shown in orange and data for BOS is shown in blue. PM<sub>10</sub> data is represented with solid lines and PM<sub>1</sub> data is shown as dashed lines. Note the changes in y-axis between the figures

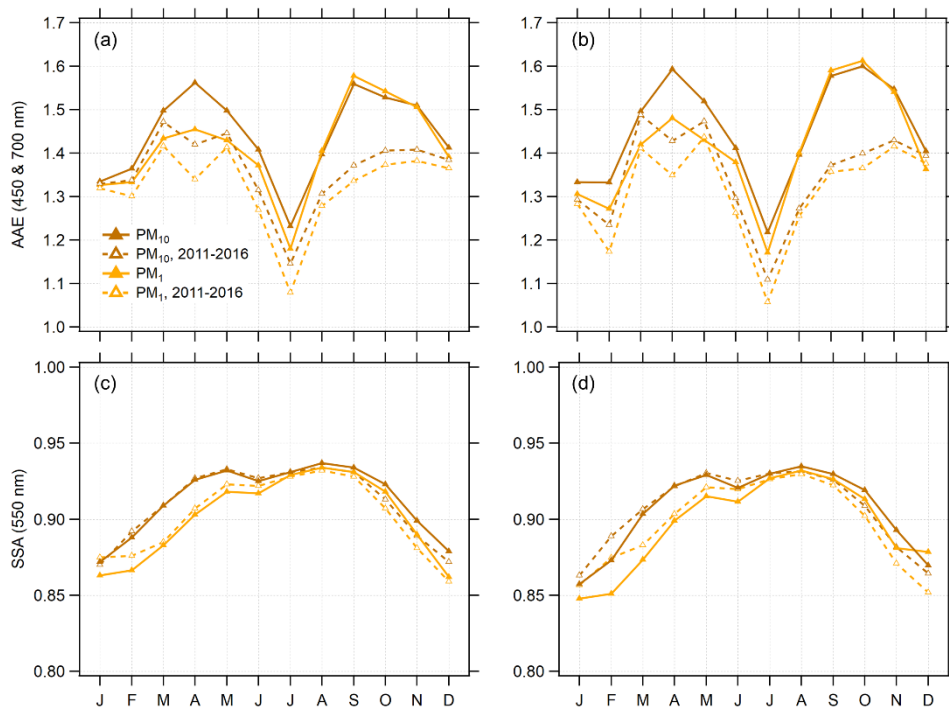

130 **Figure S8:** Monthly (a) median and (b) mean values of AAE (450 & 700 nm) and (c) median and (d) mean values of SSA (550 nm) at SPL.  $PM_{10}$  data is represented with dark orange solid lines and  $PM_1$  data is shown as light orange dashed lines. Values representing the entire SPL data range investigated in this work (2011-2024) are shown using closed markers, while values representing the data subrange of 2011-2016 are shown using open markers. Both medians and means are shown to  
 135 make the data more comparable to that presented by Japngie-Green et al. (2019), wherein only monthly means were reported.

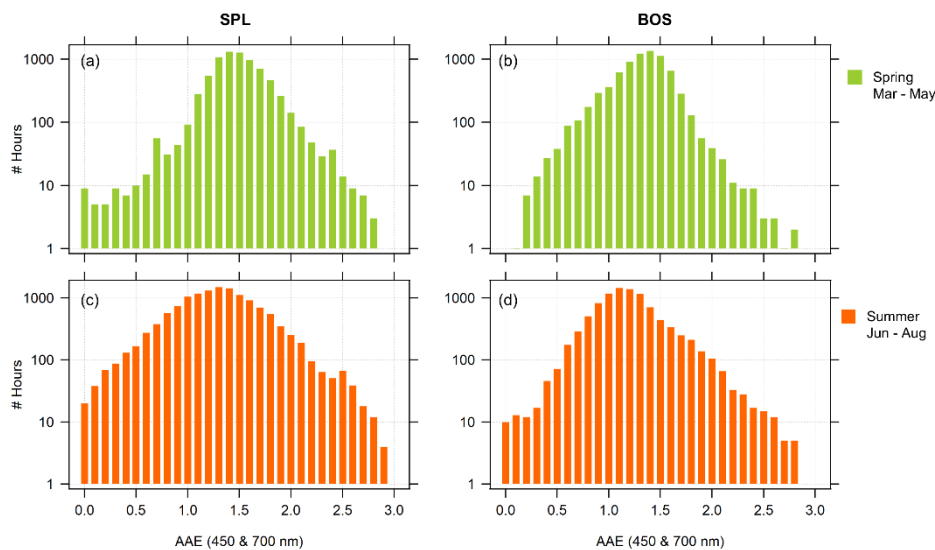

**Figure S9:** Histograms of hourly AAE data, with the y-axis showing a total count of the number of hourly periods (# hours), for the spring and summer periods over all years at (a, c) SPL (2011-2024) and (b, d) BOS (2019-2024). Note that the y-axis is a log scale.

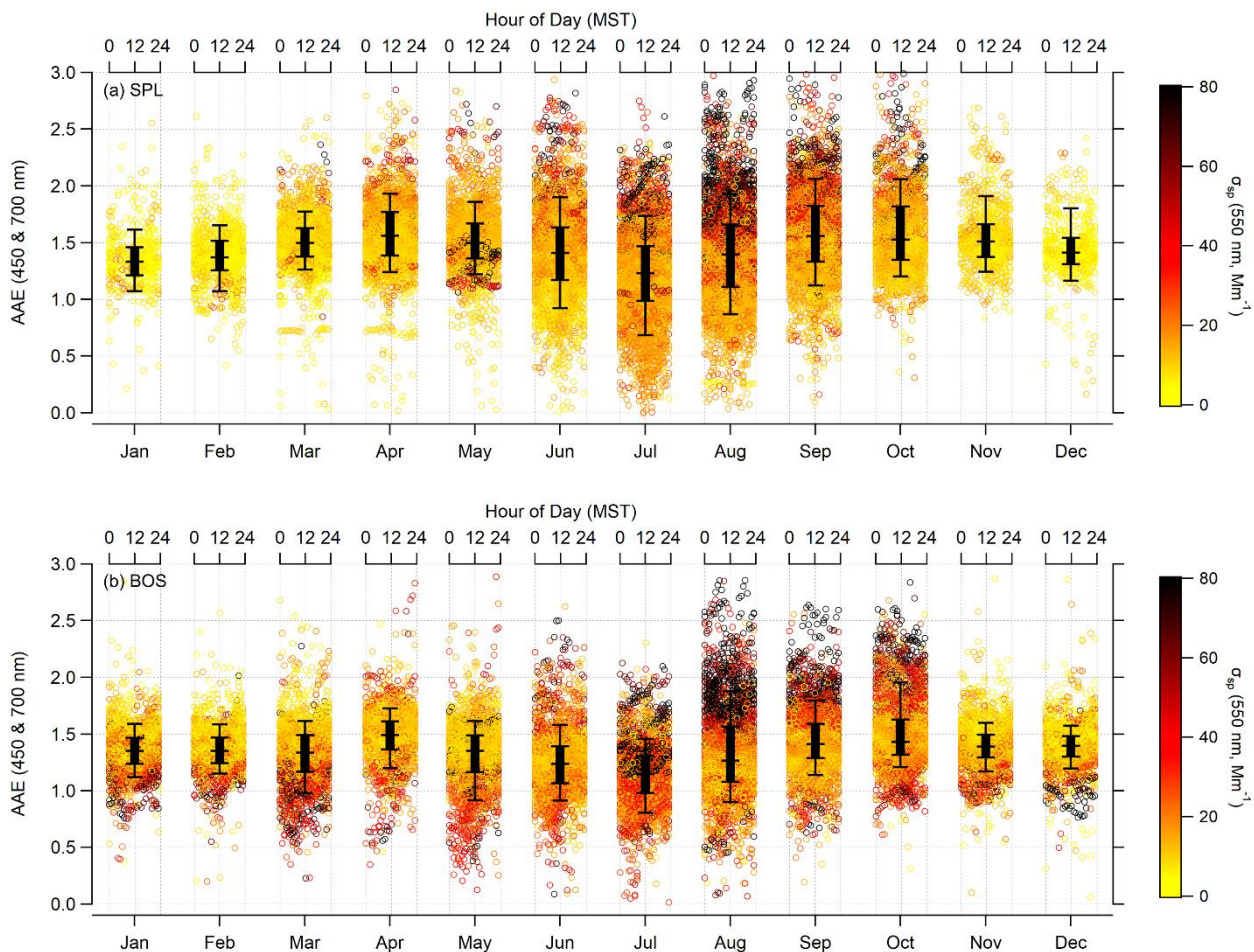

**Figure S10:** Monthly analysis of AAE values for **(a)** SPL and **(b)** BOS. For each plot the hourly AAE data for each month is shown, plotted by hour of day on the top axis and colored by the  $\sigma_{sp}$  (550 nm) value to show variation in AAE values with aerosol loadings. Monthly percentiles (10<sup>th</sup>, 25<sup>th</sup>, 50<sup>th</sup>, 75<sup>th</sup>, and 90<sup>th</sup>) for AAE are shown overtop the hourly data with black markers and bars.

145

## Section S4: Further information on the systematic variability of derived optical properties and aerosol classification

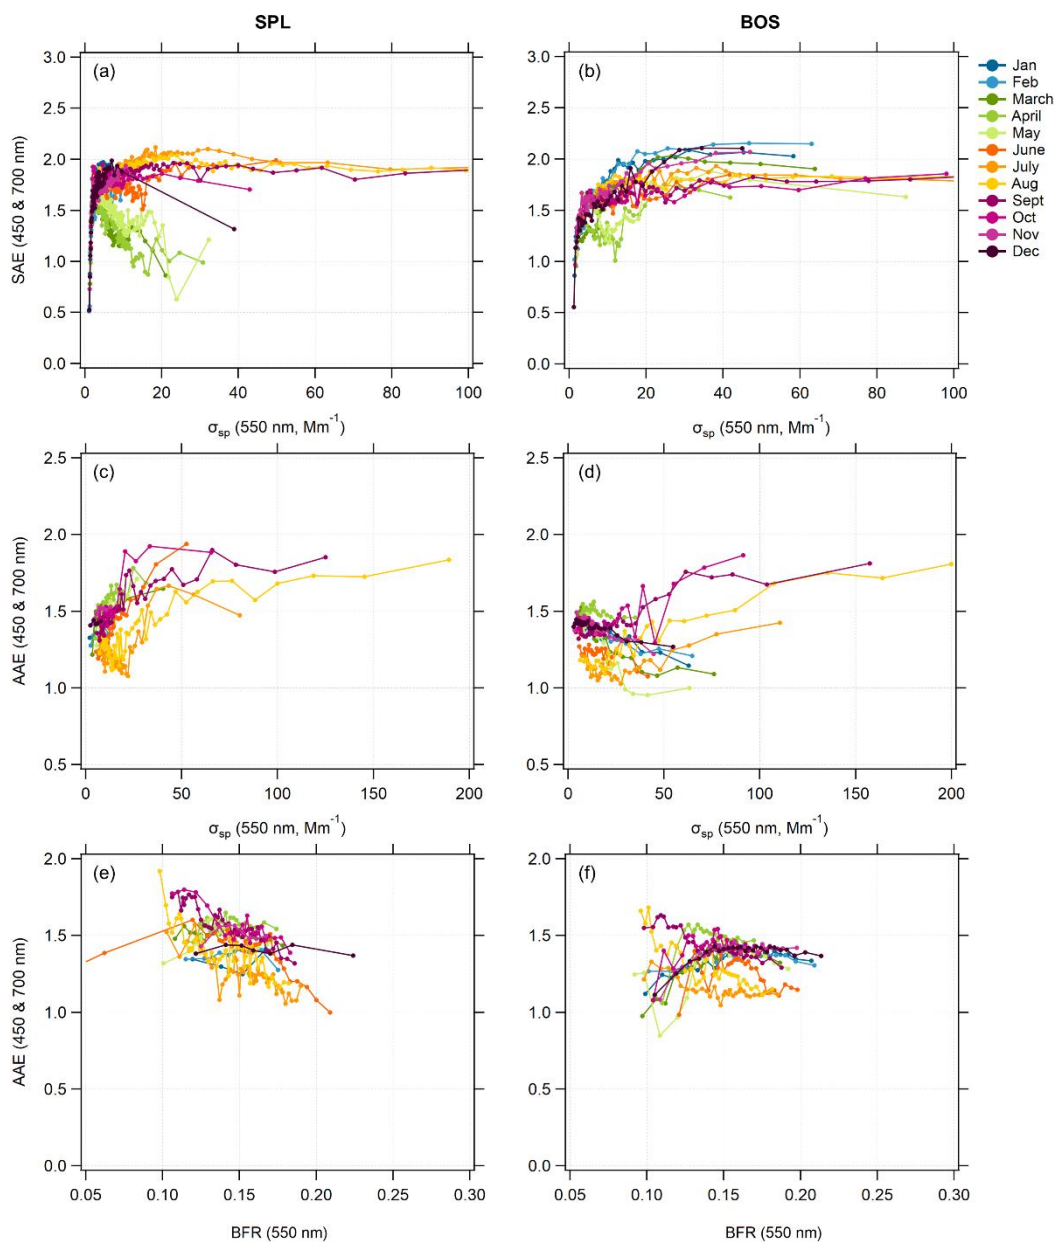

150 **Figure S11:** Top row is  $PM_{10}$  SAE (450 & 700 nm) binned by  $\sigma_{sp}$  (550 nm) for (a) SPL and (b) BOS. Middle row is  $PM_{10}$  AAE (450 & 700 nm) binned by the  $\sigma_{sp}$  (550 nm) for (c) SPL and (d) BOS. The bottom row is  $PM_{10}$  AAE (450 & 700 nm) binned by the Bfr (550 nm) for (e) SPL and (f) BOS. For all plots, each data point represents the median of 100 data points. Traces are colored by month according to the legend.

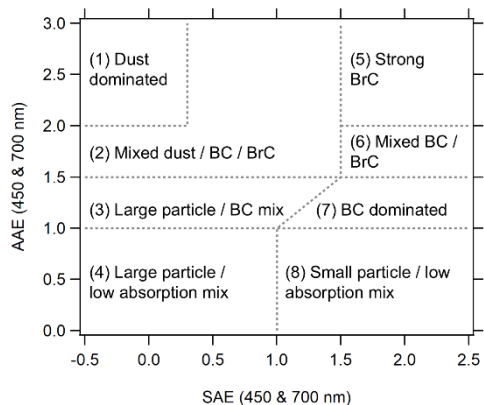

|   |                                     | SAE Bounds           | AAE Bounds           |
|---|-------------------------------------|----------------------|----------------------|
| 1 | Dust dominated                      | $SAE < 0.3$          | $AAE \geq 2$         |
| 2 | Mixed dust / BC / BrC               | $0.3 \leq SAE < 1.5$ | $AAE \geq 1.5$       |
|   |                                     |                      | and if               |
|   |                                     | $SAE < 0.3$          | $1.5 \leq AAE < 2.0$ |
| 3 | Large particle / BC mix             | $SAE < AAE$          | $1.0 \leq AAE < 1.5$ |
| 4 | Large particle / low absorption mix | $SAE < 1.0$          | $AAE < 1.0$          |
| 5 | Strong BrC                          | $SAE \geq 1.5$       | $1.5 \leq AAE < 2.0$ |
| 6 | Mixed BC / BrC                      | $SAE \geq 1.5$       | $1.0 \leq AAE < 1.5$ |
| 7 | BC dominated                        | $SAE \geq AAE$       | $1.0 \leq AAE < 1.5$ |
| 8 | Small particle / low absorption mix | $SAE \geq 1.0$       | $AAE < 1.0$          |

155

**Figure S12:** (left) Map of aerosol classification defined by Cappa et al. (2016). (right) Numeric bounds for each aerosol classification using the AAE and SAE values.

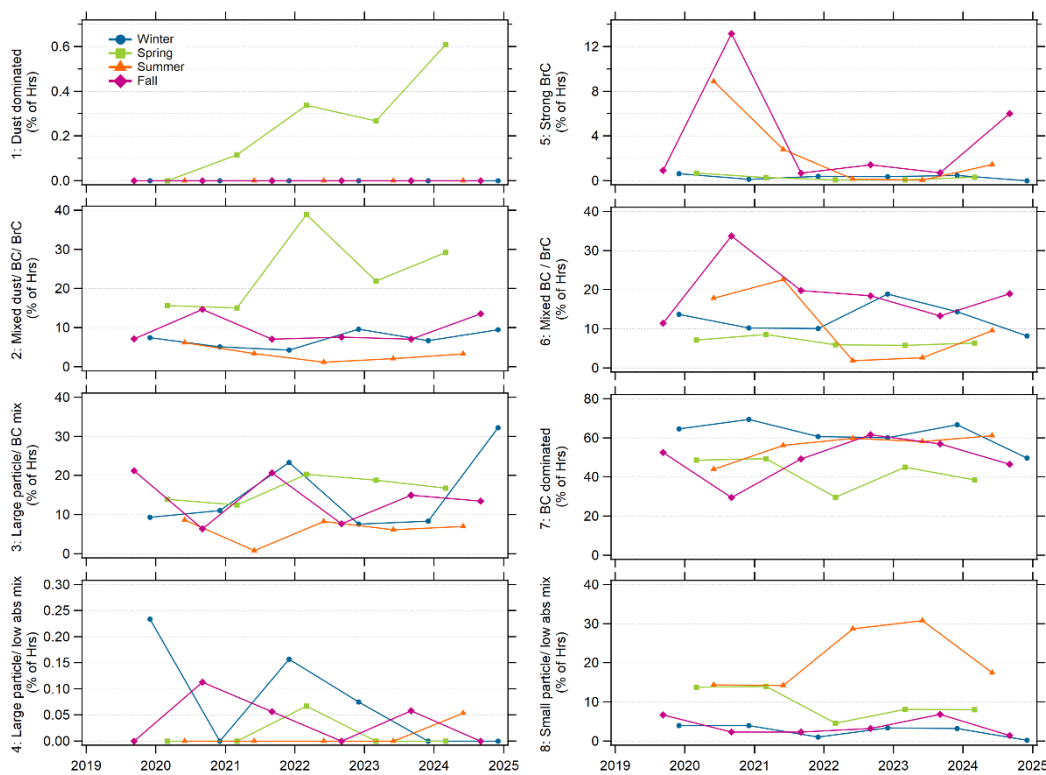

160

**Figure S13:** Percent of hours each season at BOS attributable to the 8 aerosol classifications defined by Cappa et al. (2016) over the entire measurement period. Note that the last winter data point at the end of the time series only represents data from December 2024.

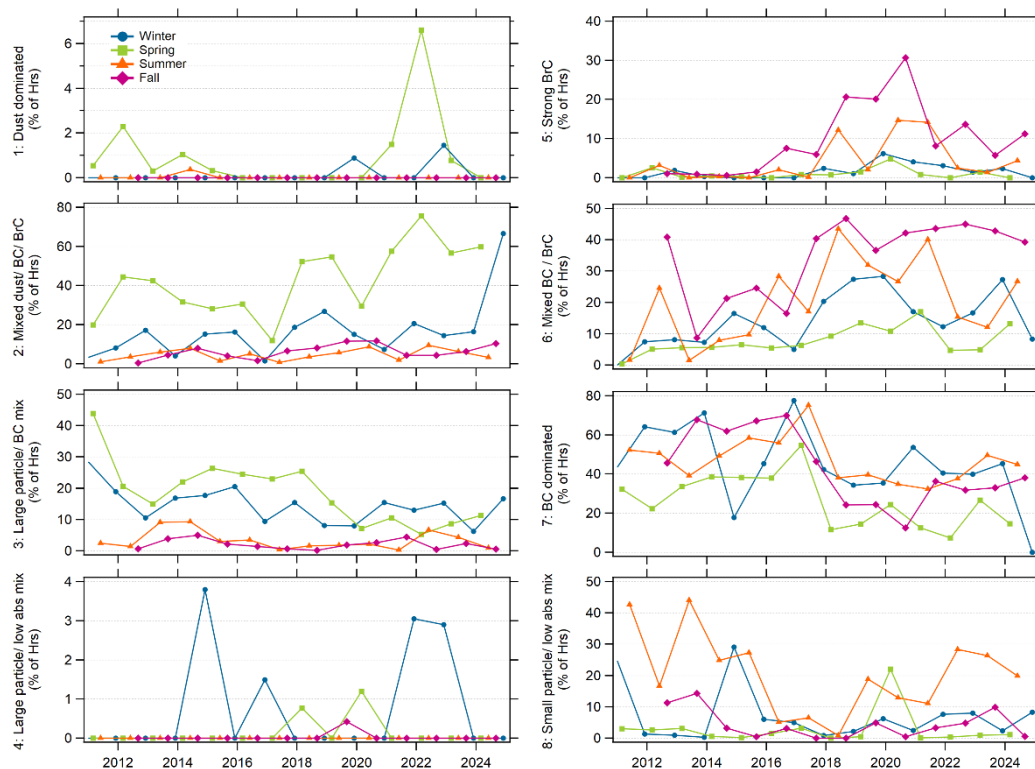

165

**Figure S14:** Percent of hours each season at SPL attributable to the 8 aerosol classifications defined by Cappa et al. (2016) over the entire measurement period. Note that the last winter data point at the end of the time series only represents data from December 2024.

170

**Table S6:** Percent of hours per season in each of the eight aerosol regimes defined by Cappa et al. (2016). The average ( $\mu$ ) and standard deviation ( $\sigma$ ) are reported in each cell as  $\mu \pm \sigma$ . Class descriptions can be found above in Fig. S10. Or each season, the aerosol classification representing the largest percentage of hours is shown in bold.

| Class # | SPL (2011 – 2024) |                |                |                | BOS (2019 – 2024) |               |               |                |
|---------|-------------------|----------------|----------------|----------------|-------------------|---------------|---------------|----------------|
|         | Winter            | Spring         | Summer         | Fall           | Winter            | Spring        | Summer        | Fall           |
| 1       | 0.2 ± 0.4         | 1 ± 2          | 0.1 ± 0.1      | 0              | 0                 | 0.3 ± 0.2     | 0             | 0              |
| 2       | 17 ± 16           | <b>43 ± 18</b> | 5 ± 3          | 6 ± 4          | 7 ± 2             | 20 ± 10       | 3 ± 2         | 10 ± 4         |
| 3       | 15 ± 6            | 19 ± 10        | 3 ± 3          | 2 ± 2          | 20 ± 10           | 16 ± 3        | 6 ± 3         | 14 ± 6         |
| 4       | 1 ± 1             | 0.1 ± 0.4      | 0              | 0.1 ± 0.1      | 0.1 ± 0.1         | 0.01 ± 0.03   | 0.01 ± 0.02   | 0.04 ± 0.05    |
| 5       | 2 ± 2             | 1 ± 1          | 4 ± 5          | 10 ± 9         | 0.3 ± 0.2         | 0.3 ± 0.3     | 3 ± 4         | 4 ± 5          |
| 6       | 14 ± 9            | 8 ± 4          | 20 ± 10        | 34 ± 10        | 13 ± 4            | 7 ± 1         | 11 ± 9        | 19 ± 8         |
| 7       | <b>45 ± 20</b>    | 26 ± 14        | <b>47 ± 11</b> | <b>43 ± 19</b> | <b>62 ± 7</b>     | <b>42 ± 8</b> | <b>56 ± 7</b> | <b>50 ± 10</b> |
| 8       | 7 ± 9             | 3 ± 6          | 20 ± 10        | 4 ± 5          | 3 ± 2             | 10 ± 4        | 21 ± 8        | 4 ± 2          |

175

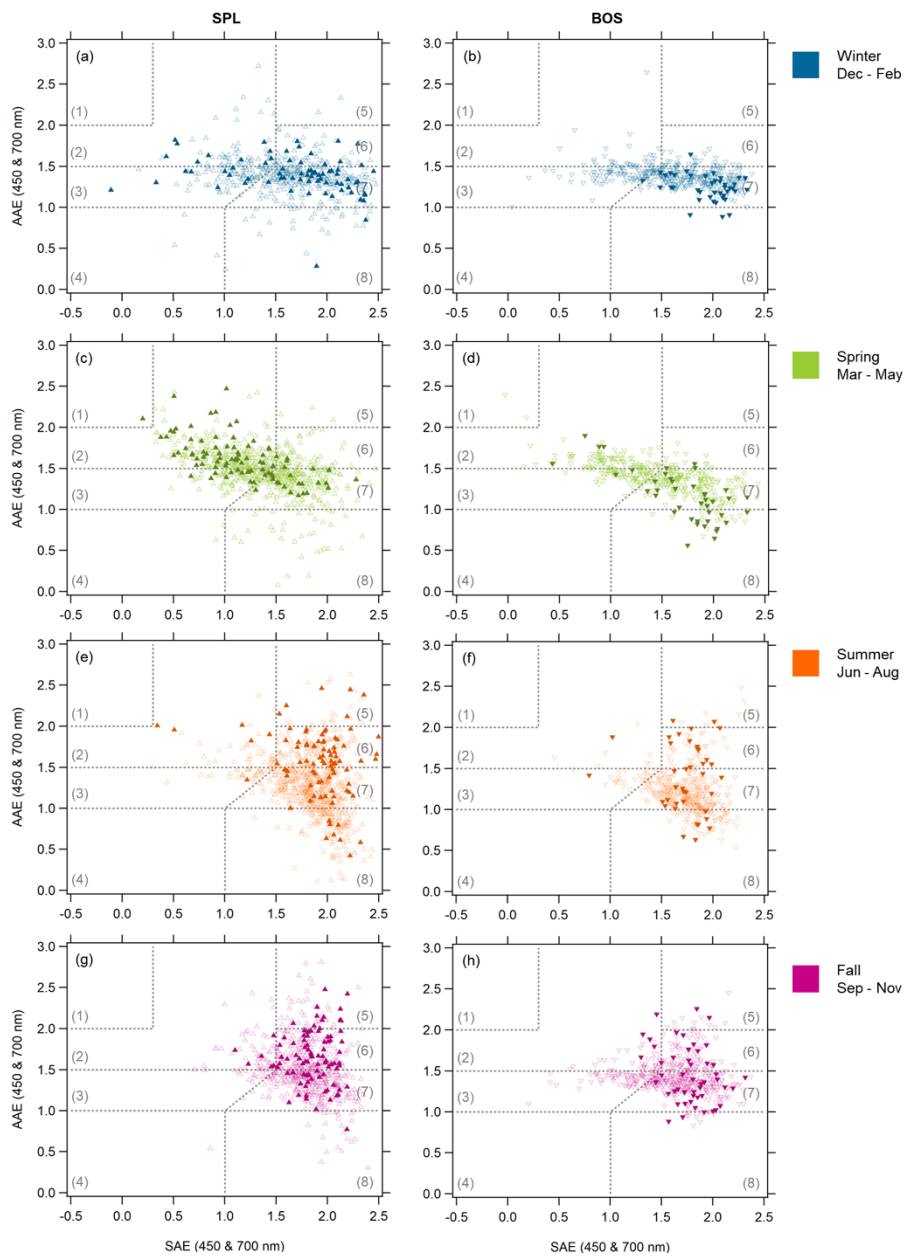

**Figure S15:** Daily medians of AAE vs SSA (450 & 700 nm) for all four seasons at (a, c, e, g) SPL and (b, d, f, h) BOS. Different regimes defined by Cappa et al. (2016) are outlined using grey markers and are labeled one through eight: (1) dust, (2) mixed dust/ BC/ BrC, (3) large particle / BC mix, (4) large particles with low absorption, (5) BrC, (6) mixed BC/ BrC, (7) BC, and (8) small particles with low absorption. For all data open markers show all data while closed markers show data where the daily average  $\sigma_{sp}$  value was above or equal to the 90<sup>th</sup> percentile for the month.

180

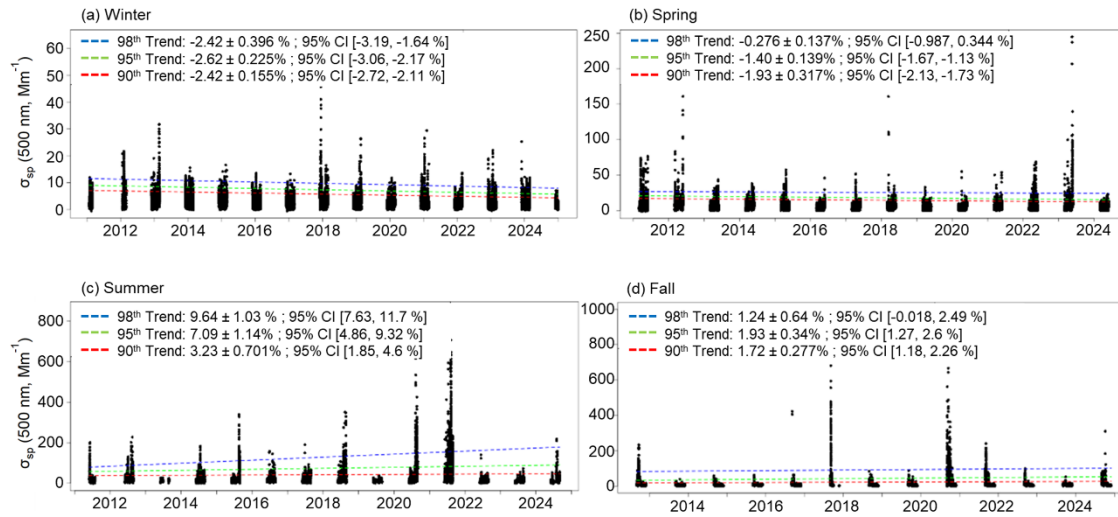

**Figure S16:** Seasonal quantile regression of  $\sigma_{sp}$  (500 nm) at SPL showing the trend ( $\% \text{ yr}^{-1}$ ) for the 90<sup>th</sup>, 95<sup>th</sup>, and 98<sup>th</sup> percentile data in each season: (a) Winter, (b) Spring, (c) Summer, and (d) Fall.

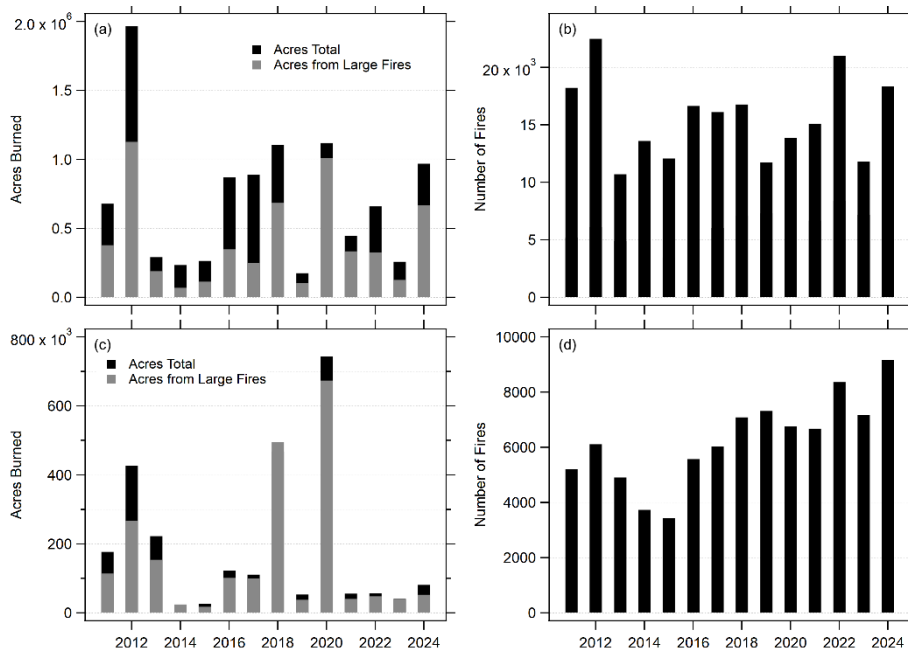

190

**Figure S17:** (left) Acres burned and (right) number of wildfires in Colorado by year. For the acres burned, the black bar shows the total acreage and the grey bar shows the acres burned by ‘large fires’ classified as fires that are 100 acres or more in timber fuel types, 300 acres or more in grass fuel types, or a fire that has a Type 1 or Type 2 IMT assigned. Panels (a) & (b) show data for the entire Rocky Mountain Area – including Colorado, Kansas, Nebraska, South Dakota, and Wyoming – while (c) & (d) show data only for Colorado. This data was extracted from the Rocky Mountain Area Coordination Center (RMACC) annual activity reports (<https://gacc.nifc.gov/rmcc/intelligence.php>).

195

**Table S7:** Results of the quantile regression analysis for  $\sigma_{sp}$  (550 nm). Trends are reported for each quantile in both Mm-1 yr<sup>-1</sup> and % yr<sup>-1</sup>. The p-value is reported, and trend values that are insignificant are in grey text.

| Quantile    | Variable / Units                         | Winter         | Spring         | Summer       | Fall           |
|-------------|------------------------------------------|----------------|----------------|--------------|----------------|
| <b>0.1</b>  | Trend: Mm <sup>-1</sup> yr <sup>-1</sup> | -0.016 ± 0.001 | -0.024 ± 0.006 | -0.04 ± 0.01 | -0.001 ± 0.005 |
|             | Trend: % yr <sup>-1</sup>                | -1.1 ± 0.1     | -1.0 ± 0.3     | -0.7 ± 0.2   | -0.1 ± 0.2     |
|             | p-value                                  | <<0.001        | <<0.001        | <<0.001      | 0.789          |
| <b>0.2</b>  | Trend: Mm <sup>-1</sup> yr <sup>-1</sup> | -0.029 ± 0.002 | -0.044 ± 0.006 | -0.04 ± 0.01 | 0.019 ± 0.006  |
|             | Trend: % yr <sup>-1</sup>                | -1.7 ± 0.1     | -1.3 ± 0.2     | -0.5 ± 0.1   | 0.6 ± 0.2      |
|             | p-value                                  | <<0.001        | <<0.001        | 0.001        | 0.002          |
| <b>0.3</b>  | Trend: Mm <sup>-1</sup> yr <sup>-1</sup> | -0.038 ± 0.002 | -0.094 ± 0.007 | -0.03 ± 0.01 | 0.028 ± 0.008  |
|             | Trend: % yr <sup>-1</sup>                | -1.8 ± 0.1     | -1.9 ± 0.1     | -0.4 ± 0.1   | 0.7 ± 0.2      |
|             | p-value                                  | <<0.001        | <<0.001        | 0.005        | <<0.001        |
| <b>0.4</b>  | Trend: Mm <sup>-1</sup> yr <sup>-1</sup> | -0.043 ± 0.003 | -0.112 ± 0.008 | -0.02 ± 0.01 | 0.06 ± 0.01    |
|             | Trend: % yr <sup>-1</sup>                | -1.7 ± 0.1     | -1.8 ± 0.1     | -0.2 ± 0.1   | 1.0 ± 0.2      |
|             | p-value                                  | <<0.001        | <<0.001        | 0.068        | <<0.001        |
| <b>0.5</b>  | Trend: Mm <sup>-1</sup> yr <sup>-1</sup> | -0.056 ± 0.004 | -0.129 ± 0.009 | -0.03 ± 0.02 | 0.07 ± 0.01    |
|             | Trend: % yr <sup>-1</sup>                | -1.7 ± 0.1     | -1.7 ± 0.1     | -0.3 ± 0.1   | 0.8 ± 0.1      |
|             | p-value                                  | <<0.001        | <<0.001        | 0.062        | <<0.001        |
| <b>0.6</b>  | Trend: Mm <sup>-1</sup> yr <sup>-1</sup> | -0.075 ± 0.005 | -0.14 ± 0.01   | -0.08 ± 0.02 | 0.09 ± 0.01    |
|             | Trend: % yr <sup>-1</sup>                | -1.9 ± 0.1     | -1.6 ± 0.1     | -0.6 ± 0.2   | 0.7 ± 0.1      |
|             | p-value                                  | <<0.001        | <<0.001        | <<0.001      | <<0.001        |
| <b>0.7</b>  | Trend: Mm <sup>-1</sup> yr <sup>-1</sup> | -0.096 ± 0.006 | -0.19 ± 0.01   | -0.12 ± 0.03 | 0.15 ± 0.02    |
|             | Trend: % yr <sup>-1</sup>                | -2.0 ± 0.1     | -1.8 ± 0.1     | -0.8 ± 0.2   | 0.9 ± 0.1      |
|             | p-value                                  | <<0.001        | <<0.001        | <<0.001      | <<0.001        |
| <b>0.8</b>  | Trend: Mm <sup>-1</sup> yr <sup>-1</sup> | -0.123 ± 0.007 | -0.28 ± 0.02   | -0.02 ± 0.07 | 0.24 ± 0.03    |
|             | Trend: % yr <sup>-1</sup>                | -2.0 ± 0.1     | -2.0 ± 0.1     | -0.1 ± 0.4   | 1.0 ± 0.1      |
|             | p-value                                  | <<0.001        | <<0.001        | 0.824        | <<0.001        |
| <b>0.90</b> | Trend: Mm <sup>-1</sup> yr <sup>-1</sup> | -0.19 ± 0.01   | -0.40 ± 0.02   | 0.7 ± 0.2    | 0.7 ± 0.1      |
|             | Trend: % yr <sup>-1</sup>                | -2.4 ± 0.2     | -1.9 ± 0.1     | 3.2 ± 0.7    | 1.7 ± 0.3      |
|             | p-value                                  | <<0.001        | <<0.001        | <<0.001      | <<0.001        |
| <b>0.92</b> | Trend: Mm <sup>-1</sup> yr <sup>-1</sup> | -0.20 ± 0.01   | -0.44 ± 0.03   | 0.9 ± 0.2    | 0.8 ± 0.2      |
|             | Trend: % yr <sup>-1</sup>                | -2.5 ± 0.2     | -1.9 ± 0.1     | 3.5 ± 0.9    | 1.2 ± 0.2      |
|             | p-value                                  | <<0.001        | <<0.001        | <<0.001      | <<0.001        |
| <b>0.94</b> | Trend: Mm <sup>-1</sup> yr <sup>-1</sup> | -0.22 ± 0.02   | -0.44 ± 0.03   | 2.0 ± 0.3    | 1.2 ± 0.2      |
|             | Trend: % yr <sup>-1</sup>                | -2.5 ± 0.2     | -1.6 ± 0.1     | 6 ± 1        | 1.8 ± 0.4      |
|             | p-value                                  | <<0.001        | <<0.001        | <<0.001      | <<0.001        |
| <b>0.96</b> | Trend: Mm <sup>-1</sup> yr <sup>-1</sup> | -0.24 ± 0.02   | -0.36 ± 0.06   | 3.3 ± 0.5    | 2.4 ± 0.4      |
|             | Trend: % yr <sup>-1</sup>                | -2.7 ± 0.2     | -1.0 ± 0.2     | 9 ± 1        | 2.4 ± 0.4      |
|             | p-value                                  | <<0.001        | <<0.001        | <<0.001      | <<0.001        |
| <b>0.98</b> | Trend: Mm <sup>-1</sup> yr <sup>-1</sup> | -0.23 ± 0.04   | -0.1 ± 0.2     | 7.5 ± 0.8    | 1.6 ± 0.8      |
|             | Trend: % yr <sup>-1</sup>                | -2.4 ± 0.4     | -0.3 ± 0.3     | 10 ± 1       | 1.2 ± 0.6      |
|             | p-value                                  | <<0.001        | 0.383          | <<0.001      | 0.053          |

200

205

**Table S8:** Results of the quantile regression analysis for SAE (450 & 700 nm). Trends are reported for each quantile in both  $\text{Mm}^{-1} \text{yr}^{-1}$  and  $\% \text{yr}^{-1}$ . The p-value is reported, and trend values that are insignificant are in grey text.

| Quantile    | Variable / Units                       | Winter         | Spring         | Summer         | Fall           |
|-------------|----------------------------------------|----------------|----------------|----------------|----------------|
| <b>0.1</b>  | Trend: $\text{Mm}^{-1} \text{yr}^{-1}$ | -0.036 ± 0.002 | -0.007 ± 0.001 | 0.002 ± 0.001  | -0.017 ± 0.001 |
|             | Trend: $\% \text{yr}^{-1}$             | -3.5 ± 0.2     | -1.0 ± 0.2     | 0.1 ± 0.1      | -1.00 ± 0.09   |
|             | p-value                                | <<0.001        | <<0.001        | 0.207          | <<0.001        |
| <b>0.2</b>  | Trend: $\text{Mm}^{-1} \text{yr}^{-1}$ | -0.026 ± 0.002 | -0.007 ± 0.001 | -0.003 ± 0.001 | -0.015 ± 0.001 |
|             | Trend: $\% \text{yr}^{-1}$             | -2.1 ± 0.1     | -0.7 ± 0.1     | -0.21 ± 0.05   | -0.83 ± 0.07   |
|             | p-value                                | <<0.001        | <<0.001        | <<0.001        | <<0.001        |
| <b>0.3</b>  | Trend: $\text{Mm}^{-1} \text{yr}^{-1}$ | -0.020 ± 0.001 | -0.005 ± 0.001 | -0.004 ± 0.001 | -0.013 ± 0.001 |
|             | Trend: $\% \text{yr}^{-1}$             | -1.4 ± 0.1     | -0.46 ± 0.09   | -0.24 ± 0.05   | -0.67 ± 0.05   |
|             | p-value                                | <<0.001        | <<0.001        | <<0.001        | <<0.001        |
| <b>0.4</b>  | Trend: $\text{Mm}^{-1} \text{yr}^{-1}$ | -0.017 ± 0.001 | -0.006 ± 0.001 | -0.005 ± 0.001 | -0.011 ± 0.001 |
|             | Trend: $\% \text{yr}^{-1}$             | -1.05 ± 0.08   | -0.47 ± 0.09   | -0.29 ± 0.03   | -0.54 ± 0.04   |
|             | p-value                                | <<0.001        | <<0.001        | <<0.001        | <<0.001        |
| <b>0.5</b>  | Trend: $\text{Mm}^{-1} \text{yr}^{-1}$ | -0.013 ± 0.001 | -0.006 ± 0.001 | -0.007 ± 0.001 | -0.010 ± 0.001 |
|             | Trend: $\% \text{yr}^{-1}$             | -0.77 ± 0.08   | -0.44 ± 0.08   | -0.37 ± 0.03   | -0.51 ± 0.04   |
|             | p-value                                | <<0.001        | <<0.001        | <<0.001        | <<0.001        |
| <b>0.6</b>  | Trend: $\text{Mm}^{-1} \text{yr}^{-1}$ | -0.012 ± 0.001 | -0.006 ± 0.001 | -0.007 ± 0.001 | -0.011 ± 0.001 |
|             | Trend: $\% \text{yr}^{-1}$             | -0.63 ± 0.07   | -0.37 ± 0.07   | -0.36 ± 0.02   | -0.51 ± 0.04   |
|             | p-value                                | <<0.001        | <<0.001        | <<0.001        | <<0.001        |
| <b>0.7</b>  | Trend: $\text{Mm}^{-1} \text{yr}^{-1}$ | -0.009 ± 0.001 | -0.003 ± 0.001 | -0.006 ± 0.001 | -0.009 ± 0.001 |
|             | Trend: $\% \text{yr}^{-1}$             | -0.47 ± 0.06   | -0.18 ± 0.06   | -0.31 ± 0.02   | -0.41 ± 0.03   |
|             | p-value                                | <<0.001        | 0.004          | <<0.001        | <<0.001        |
| <b>0.8</b>  | Trend: $\text{Mm}^{-1} \text{yr}^{-1}$ | -0.006 ± 0.001 | -0.002 ± 0.001 | -0.006 ± 0.001 | -0.009 ± 0.001 |
|             | Trend: $\% \text{yr}^{-1}$             | -0.28 ± 0.06   | -0.11 ± 0.06   | -0.28 ± 0.03   | -0.40 ± 0.04   |
|             | p-value                                | <<0.001        | 0.089          | <<0.001        | <<0.001        |
| <b>0.90</b> | Trend: $\text{Mm}^{-1} \text{yr}^{-1}$ | -0.001 ± 0.001 | -0.002 ± 0.001 | -0.004 ± 0.001 | -0.004 ± 0.001 |
|             | Trend: $\% \text{yr}^{-1}$             | -0.01 ± 0.07   | -0.09 ± 0.07   | -0.16 ± 0.03   | -0.18 ± 0.05   |
|             | p-value                                | 0.935          | 0.187          | <<0.001        | 0.001          |
| <b>0.92</b> | Trend: $\text{Mm}^{-1} \text{yr}^{-1}$ | 0.002 ± 0.002  | -0.002 ± 0.002 | -0.002 ± 0.001 | -0.002 ± 0.001 |
|             | Trend: $\% \text{yr}^{-1}$             | 0.07 ± 0.08    | -0.10 ± 0.07   | -0.11 ± 0.04   | -0.09 ± 0.06   |
|             | p-value                                | 0.421          | 0.160          | 0.005          | 0.108          |
| <b>0.94</b> | Trend: $\text{Mm}^{-1} \text{yr}^{-1}$ | 0.003 ± 0.002  | 0.001 ± 0.002  | -0.001 ± 0.001 | 0.001 ± 0.002  |
|             | Trend: $\% \text{yr}^{-1}$             | 0.11 ± 0.08    | 0.1 ± 0.1      | -0.01 ± 0.05   | 0.03 ± 0.07    |
|             | p-value                                | 0.155          | 1.00           | 0.784          | 0.618          |
| <b>0.96</b> | Trend: $\text{Mm}^{-1} \text{yr}^{-1}$ | 0.003 ± 0.003  | 0.001 ± 0.002  | 0.007 ± 0.002  | 0.002 ± 0.002  |
|             | Trend: $\% \text{yr}^{-1}$             | 0.11 ± 0.08    | 0.04 ± 0.08    | 0.31 ± 0.08    | 0.14 ± 0.09    |
|             | p-value                                | 0.371          | 0.595          | <<0.001        | 0.109          |
| <b>0.98</b> | Trend: $\text{Mm}^{-1} \text{yr}^{-1}$ | 0.001 ± 0.004  | 0.002 ± 0.003  | 0.034 ± 0.005  | 0.005 ± 0.004  |
|             | Trend: $\% \text{yr}^{-1}$             | 0.1 ± 0.2      | 0.1 ± 0.1      | 1.4 ± 0.2      | 0.2 ± 0.1      |
|             | p-value                                | 0.755          | 0.313          | <<0.001        | 0.138          |

## References

- Bond, T. C., Anderson, T. L., and Campbell, D.: Calibration and Intercomparison of Filter-Based Measurements of Visible Light Absorption by Aerosols, *Aerosol Sci. Technol*, 30, 582–600, <https://doi.org/10.1080/027868299304435>, 1999.
- 215 Cappa, C. D., Kolesar, K. R., Zhang, X., Atkinson, D. B., Pekour, M. S., Zaveri, R. A., Zelenyuk, A., and Zhang, Q.: Understanding the optical properties of ambient sub- and supermicron particulate matter: results from the CARES 2010 field study in northern California, *Atmos. Chem. Phys.*, 16, 6511–6535, <https://doi.org/10.5194/acp-16-6511-2016>, 2016.
- Japngie-Green, C. M., Andrews, E., McCubbin, I. B., Ogren, J. A., and Hallar, A. G.: Climatology of Aerosol Optical Properties at Storm Peak Laboratory, *Aerosol Air Qual. Res.*, 19, 1205–1213, <https://doi.org/10.4209/aaqr.2018.05.0204>,  
220 2019.
- Ogren, J. A.: Comment on “Calibration and Intercomparison of Filter-Based Measurements of Visible Light Absorption by Aerosols,” *Aerosol Sci. Technol*, 44, 589–591, <https://doi.org/10.1080/02786826.2010.482111>, 2010.
- Ogren, J. A., Wendell, J., Andrews, E., and Sheridan, P. J.: Continuous light absorption photometer for long-term studies, *Atmos. Meas. Tech.*, 10, 4805–4818, <https://doi.org/10.5194/amt-10-4805-2017>, 2017.
- 225 Sherman, J. P., Sheridan, P. J., Ogren, J. A., Andrews, E., Hageman, D., Schmeisser, L., Jefferson, A., and Sharma, S.: A multi-year study of lower tropospheric aerosol variability and systematic relationships from four North American regions, *Atmos. Chem. Phys.*, 15, 12487–12517, <https://doi.org/10.5194/acp-15-12487-2015>, 2015.
